# Supplementary material for: Phytochemical Profiling, In Vitro Biological Activities, and In-Silico Studies of Ficus vasta Forssk.: An Unexplored Plant
Source: MDPI journal article supplement (doi:10.3390/antibiotics11091155), 2022-08-26
Supplement: s1 [file s1]

Supplementary file

# Phytochemical profiling, *In vitro* Biological activities, and *In-Silico* Studies of *Ficus vasta* Forssk.: An unexplored plant

Hanan Y. Aati <sup>1,\*</sup>,<sup>†</sup>, Mariyam Anwar<sup>2</sup>, Jawaher Al-Qahtani <sup>1</sup>, Areej Al-Taweel <sup>1</sup>, Kashif-ur-Rehman Khan<sup>2,\*</sup>,<sup>†</sup>, Sultan Aati<sup>3</sup>, Faisal Usman<sup>4</sup>, Bilal Ahmad Ghalloo<sup>2</sup>, Hafiz Muhammad Asif<sup>5</sup>, Jafir Hussain Shirazi<sup>6</sup>, Aliza Abbasi<sup>2</sup>

<sup>1</sup> Department of Pharmacognosy, College of Pharmacy, King Saud University, Riyadh 11495, Saudi Arabia

<sup>2</sup> Department of Pharmaceutical Chemistry, Faculty of Pharmacy, The Islamia University of Bahawalpur, Bahawalpur 63100, Pakistan

<sup>3</sup> UWA, University of Western Australia, Nedland, WA 6009, Australia

<sup>4</sup> Department of Pharmaceutics, Faculty of Pharmacy, Bahauddin Zakariya University, Multan 60000, Pakistan

<sup>5</sup> Faculty of Medicine and Allied Health Sciences, University College of Conventional Medicine, The Islamia University of Bahawalpur, Bahawalpur 63100, Pakistan

<sup>6</sup> Department of Pharmaceutics, Faculty of Pharmacy, The Islamia University of Bahawalpur, Bahawalpur 63100, Pakistan

\* Correspondence: hati@ksu.edu.pk (H.Y.A.); kashifur.rahman@iub.edu.pk (K.-u.-R.K.)

<sup>†</sup> These authors contributed equally to this work.

**Citation:** Aati, H.Y.; Anwar, M.; Al-Qahtani, J.; Al-Taweel, A.; Khan, K.-u.-R.; Aati, S.; Usman, F.; Ghalloo, B.A.; Asif, H.M.; Shirazi, J.H.; et al. Phytochemical profiling, *In vitro* Biological activities, and *In-Silico* Studies of *Ficus vasta* Forssk.: An unexplored plant. *Antibiotics* **2022**, *11*, 1155. <https://doi.org/10.3390/antibiotics11091155>

Academic Editor: Muhammad Jawad Nasim

Received: 5 July 2022

Accepted: 23 August 2022

Published: 26 August 2022

**Publisher's Note:** MDPI stays neutral with regard to jurisdictional claims in published maps and institutional affiliations.

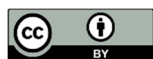

**Copyright:** © 2022 by the authors. Submitted for possible open access publication under the terms and conditions of the Creative Commons Attribution (CC BY) license (<http://creativecommons.org/licenses/by/4.0/>).

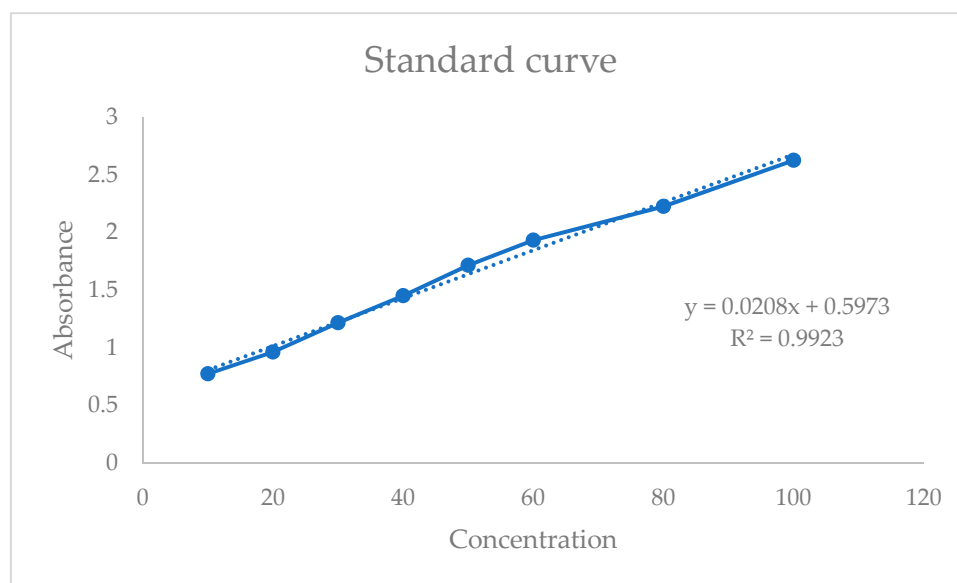

**Figure S1.** Standard curve, regression equation and  $R^2$  for quantification of phenolics

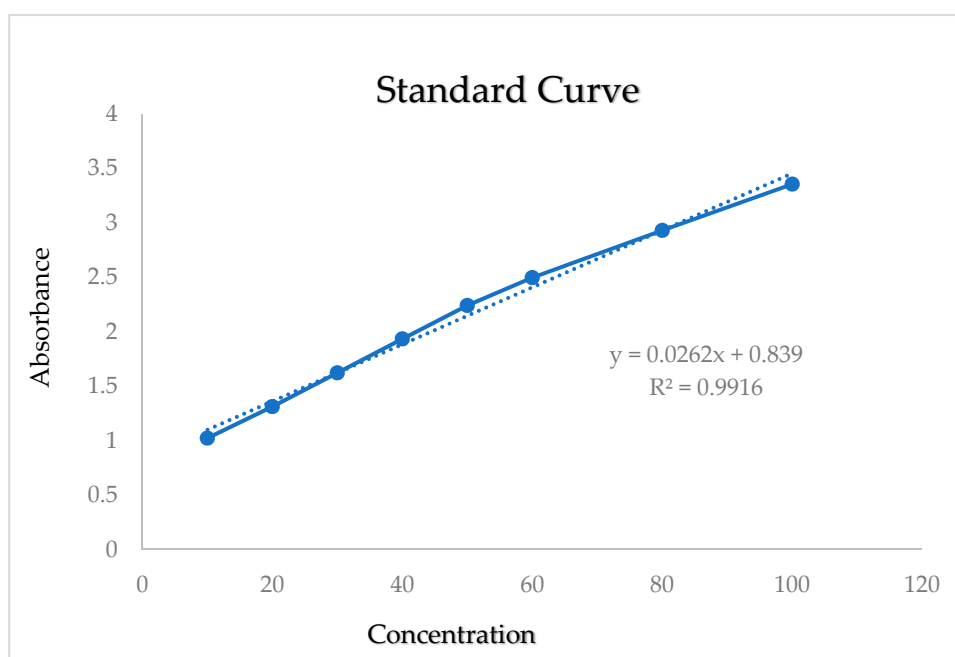

**Figure S2.** Standard curve, regression equation and  $R^2$  for quantification of flavonoids

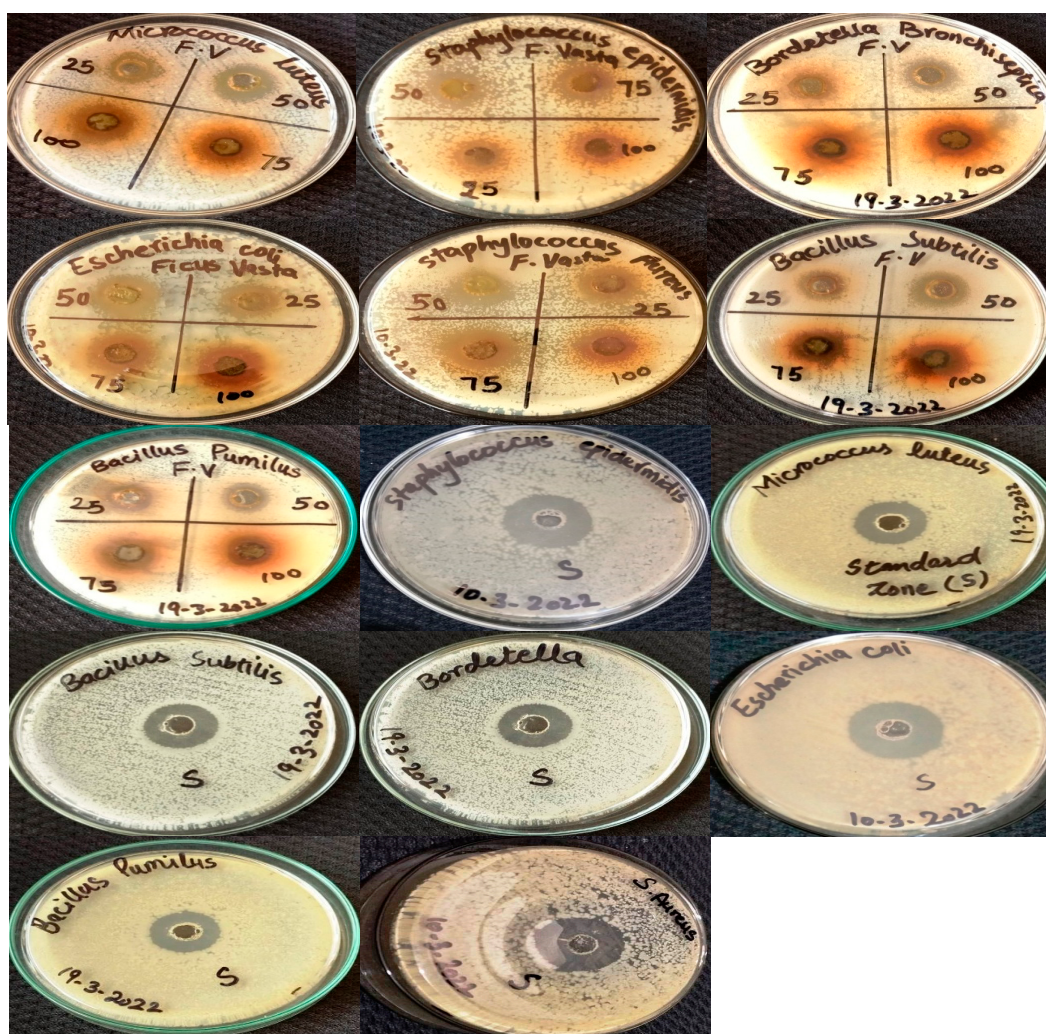

**Figure S3.** Antibacterial results of *F. vasta* ethanolic extract.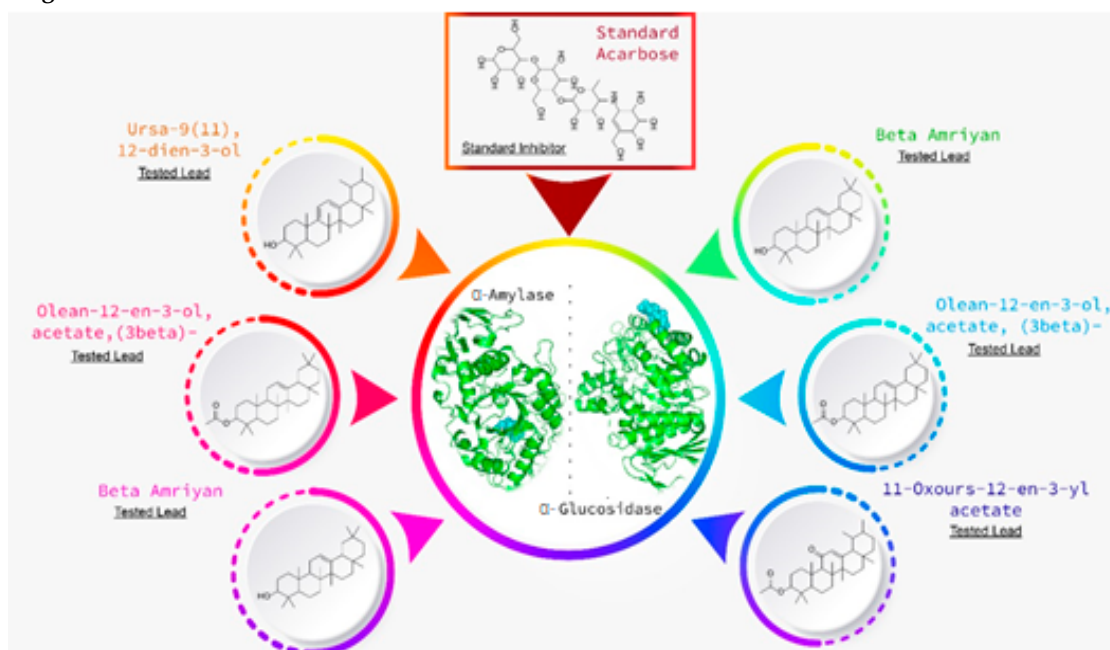**Figure S4.** Graphical representation of best three docked compounds and Acarbose against  $\alpha$ -glucosidase and  $\alpha$ -amylase.**Table S1.** Pharmacokinetic properties of best-docked compounds.

| Sr no. | Best docked compounds               | Gastrointestinal absorption | Blood-brain barrier | P-glycoprotein substrate | CYP inhibitors |          |         |         |         | log Kp skin permeation (cm/s) |
|--------|-------------------------------------|-----------------------------|---------------------|--------------------------|----------------|----------|---------|---------|---------|-------------------------------|
|        |                                     |                             |                     |                          | CYP 1A2        | CYP 2C19 | CYP 2C9 | CYP 2D6 | CYP 3A4 |                               |
| 1      | Ursa-9(11),12-dien-3-ol             | Low                         | ✖                   | ✖                        | ✖              | ✖        | ✖       | ✖       | ✖       | -2.69                         |
| 2      | Olean-12-en-3-ol, acetate, (3beta)- | Low                         | ✖                   | ✖                        | ✖              | ✖        | ✖       | ✖       | ✖       | -2.25                         |
| 3      | Beta-Amyrin                         | Low                         | ✖                   | ✖                        | ✖              | ✖        | ✖       | ✖       | ✖       | -2.41                         |
| 4      | 11-Oxours-12-en-3-yl acetate        | Low                         | ✖                   | ✖                        | ✖              | ✖        | ✖       | ✖       | ✖       | -3.2                          |
| 5      | Campesterol                         | Low                         | ✖                   | ✖                        | ✖              | ✖        | ✖       | ✖       | ✖       | -2.5                          |
| 6      | Beta-Sitosterol                     | Low                         | ✖                   | ✖                        | ✖              | ✖        | ✖       | ✖       | ✖       | -2.2                          |
| 7      | Stigmasterol                        | Low                         | ✖                   | ✖                        | ✖              | ✖        | ✓       | ✖       | ✖       | -2.74                         |

✖; NO, and ✓; yes.

**Table S2.** Toxicity profiles of best-docked compounds.

| Sr no. | Best docked compounds               | LD50 mg/kg | Predicted class | Hepatotoxic | Carcinogenic | Immunotoxic | Mutagenic | Cytotoxic |
|--------|-------------------------------------|------------|-----------------|-------------|--------------|-------------|-----------|-----------|
| 1      | Ursa-9(11),12-dien-3-ol             | 288        | 3               | ✖           | ✖            | ✓           | ✖         | ✖         |
| 2      | Olean-12-en-3-ol, acetate, (3beta)- | 3460       | 5               | ✖           | ✓            | ✓           | ✖         | ✖         |
| 3      | Beta-Amyrin                         | 70000      | 6               | ✖           | ✖            | ✓           | ✖         | ✖         |
| 4      | 11-Oxours-12-en-3-yl acetate        | 3300       | 5               | ✖           | ✓            | ✓           | ✖         | ✖         |
| 5      | Campesterol                         | 890        | 4               | ✖           | ✖            | ✓           | ✖         | ✖         |
| 6      | Beta-Sitosterol                     | 890        | 4               | ✖           | ✖            | ✓           | ✖         | ✖         |
| 7      | Stigmasterol                        | 890        | 4               | ✖           | ✖            | ✓           | ✖         | ✖         |

✓: Active, ✖: Inactive, Class I:  $LD_{50} \leq 5$ , class ii:  $5 < LD_{50} \leq 50$ , class iii:  $50 < LD_{50} \leq 300$ , class iv:  $300 < LD_{50} \leq 2000$ , class v:  $2000 < LD_{50} \leq 5000$ , and class vi:  $LD_{50} > 5000$ .

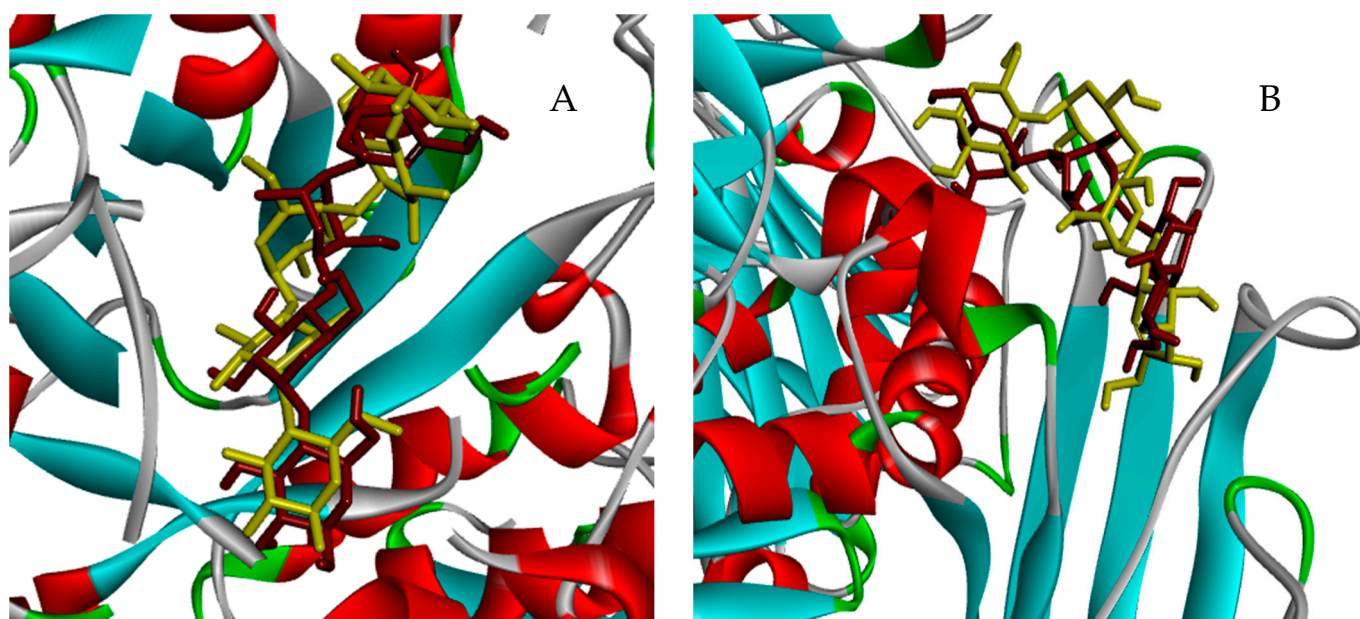

**Figure S5.** Superimposition of re-docked (Red) onto co-crystallized Acarbose (Yellow) in the active site. “A”  $\alpha$ -amylase (RMSD value=1.525 Å) and “B”  $\alpha$ -glucosidase (RMSD value=1.234 Å).
